# Supplementary material for: Effects of Initial Age and Severity on Cranial Remolding Orthotic Treatment for Infants with Deformational Plagiocephaly
Source: MDPI journal article supplement (doi:10.3390/jcm8081097), 2019-07-24
Supplement: s1 [file s1]

**Table S1.** Descriptive statistics of the Age and Severity subgroups.

| AgeGrp_new  | SeverityClass | N Obs     | Variable  | N      | Mean   | Std Dev | Median | 10th Pctl | 25th Pctl | 75th Pctl | 90th Pctl | Minimum | Maximum |
|-------------|---------------|-----------|-----------|--------|--------|---------|--------|-----------|-----------|-----------|-----------|---------|---------|
| 1VeryEarly  | Mild          | 3         | CVAIstart | 3      | 5.9000 | 0.3606  | 6.0000 | 5.5000    | 5.5000    | 6.2000    | 6.2000    | 5.5000  | 6.2000  |
|             |               |           | CVAIend   | 3      | 2.0333 | 0.6429  | 2.3000 | 1.3000    | 1.3000    | 2.5000    | 2.5000    | 1.3000  | 2.5000  |
|             | Moderate      | 5         | CVAIstart | 5      | 7.2600 | 0.9476  | 6.8000 | 6.4000    | 6.6000    | 7.9000    | 8.6000    | 6.4000  | 8.6000  |
|             |               |           | CVAIend   | 5      | 2.1400 | 0.6189  | 2.3000 | 1.4000    | 1.7000    | 2.3000    | 3.0000    | 1.4000  | 3.0000  |
| Severe      | 3             | CVAIstart | 3         | 10.267 | 0.4163 | 10.400  | 9.8000 | 9.8000    | 10.600    | 10.600    | 9.8000    | 10.600  |         |
|             |               | CVAIend   | 3         | 2.9667 | 0.5774 | 3.3000  | 2.3000 | 2.3000    | 3.3000    | 3.3000    | 2.3000    | 3.3000  |         |
| Very severe | 7             | CVAIstart | 7         | 12.643 | 1.4943 | 12.600  | 11.100 | 11.100    | 13.100    | 15.500    | 11.100    | 15.500  |         |
|             |               | CVAIend   | 7         | 3.4000 | 1.2570 | 3.1000  | 1.6000 | 2.5000    | 4.8000    | 4.9000    | 1.6000    | 4.9000  |         |
| 2Early      | Mild          | 43        | CVAIstart | 43     | 5.4791 | 0.6606  | 5.6000 | 4.6000    | 5.1000    | 6.0000    | 6.2000    | 3.1000  | 6.2000  |
|             |               |           | CVAIend   | 43     | 2.2070 | 1.0736  | 1.9000 | 1.0000    | 1.5000    | 3.4000    | 3.7000    | 0.1000  | 4.3000  |
|             | Moderate      | 97        | CVAIstart | 97     | 7.4907 | 0.7106  | 7.4000 | 6.5000    | 7.0000    | 8.2000    | 8.5000    | 6.3000  | 8.7000  |
|             |               |           | CVAIend   | 97     | 2.8505 | 0.9205  | 3.0000 | 1.7000    | 2.2000    | 3.6000    | 3.9000    | 0.6000  | 5.5000  |
| Severe      | 50            | CVAIstart | 50        | 9.7000 | 0.5425 | 9.6000  | 9.0000 | 9.2000    | 10.100    | 10.450    | 8.8000    | 11.000  |         |
|             |               | CVAIend   | 50        | 3.2920 | 0.9245 | 3.4500  | 1.9500 | 2.8000    | 3.8000    | 4.2500    | 0.8000    | 5.8000  |         |
| Very severe | 24            | CVAIstart | 24        | 12.783 | 1.4782 | 12.500  | 11.200 | 11.500    | 13.450    | 15.300    | 11.100    | 16.100  |         |
|             |               | CVAIend   | 24        | 4.7375 | 1.2645 | 4.7000  | 3.3000 | 3.8500    | 5.7500    | 6.3000    | 2.6000    | 7.5000  |         |
| 3Mid        | Mild          | 53        | CVAIstart | 53     | 5.3170 | 0.7010  | 5.5000 | 4.4000    | 5.0000    | 5.8000    | 6.0000    | 3.5000  | 6.2000  |
|             |               |           | CVAIend   | 53     | 2.4434 | 0.9864  | 2.5000 | 1.3000    | 1.8000    | 3.3000    | 3.6000    | 0.2000  | 4.8000  |
|             | Moderate      | 63        | CVAIstart | 63     | 7.5238 | 0.6453  | 7.5000 | 6.7000    | 7.0000    | 8.1000    | 8.3000    | 6.3000  | 8.7000  |
|             |               |           | CVAIend   | 63     | 3.3254 | 0.9086  | 3.5000 | 2.3000    | 2.8000    | 3.8000    | 4.2000    | 0.5000  | 6.1000  |
| Severe      | 41            | CVAIstart | 41        | 9.7634 | 0.5748 | 9.7000  | 9.1000 | 9.2000    | 10.300    | 10.400    | 8.8000    | 10.900  |         |
|             |               | CVAIend   | 41        | 4.2244 | 1.0039 | 3.9000  | 3.3000 | 3.6000    | 4.9000    | 5.7000    | 2.4000    | 6.7000  |         |
| Very severe | 9             | CVAIstart | 9         | 13.033 | 1.6591 | 12.900  | 11.100 | 11.800    | 13.700    | 16.100    | 11.100    | 16.100  |         |
|             |               | CVAIend   | 9         | 4.7556 | 1.7365 | 5.3000  | 2.4000 | 3.4000    | 5.4000    | 7.3000    | 2.4000    | 7.3000  |         |
| 4Late       | Mild          | 27        | CVAIstart | 27     | 5.0963 | 0.8239  | 5.1000 | 3.6000    | 4.4000    | 5.7000    | 6.1000    | 3.3000  | 6.2000  |
|             |               |           | CVAIend   | 27     | 2.6815 | 1.0583  | 2.8000 | 1.3000    | 2.1000    | 3.6000    | 4.0000    | 0.2000  | 4.5000  |
|             | Moderate      | 42        | CVAIstart | 42     | 7.2786 | 0.7751  | 7.1000 | 6.3000    | 6.7000    | 8.0000    | 8.4000    | 6.3000  | 8.7000  |
|             |               |           | CVAIend   | 42     | 4.0238 | 1.1774  | 3.7500 | 2.7000    | 3.2000    | 4.7000    | 6.2000    | 2.3000  | 6.6000  |
| Severe      | 13            | CVAIstart | 13        | 9.5615 | 0.6345 | 9.4000  | 9.0000 | 9.0000    | 9.8000    | 10.200    | 8.8000    | 11.000  |         |
|             |               | CVAIend   | 13        | 4.8692 | 1.5107 | 5.2000  | 2.6000 | 3.8000    | 5.5000    | 6.7000    | 2.2000    | 7.5000  |         |
| Very severe | 6             | CVAIstart | 6         | 12.250 | 1.1292 | 11.650  | 11.300 | 11.600    | 13.200    | 14.100    | 11.300    | 14.100  |         |
|             |               | CVAIend   | 6         | 6.9333 | 0.6121 | 6.9000  | 6.1000 | 6.6000    | 7.3000    | 7.8000    | 6.1000    | 7.8000  |         |
| 5VeryLate   | Mild          | 3         | CVAIstart | 3      | 5.4667 | 0.6807  | 5.7000 | 4.7000    | 4.7000    | 6.0000    | 6.0000    | 4.7000  | 6.0000  |
|             |               |           | CVAIend   | 3      | 4.2000 | 0.7550  | 4.3000 | 3.4000    | 3.4000    | 4.9000    | 4.9000    | 3.4000  | 4.9000  |
|             | Moderate      | 7         | CVAIstart | 7      | 7.0714 | 0.7455  | 7.0000 | 6.3000    | 6.4000    | 7.6000    | 8.4000    | 6.3000  | 8.4000  |
| CVAIend     |               |           | 7         | 5.1143 | 1.2747 | 5.2000  | 3.5000 | 3.5000    | 6.2000    | 6.6000    | 3.5000    | 6.6000  |         |
| Severe      | 3             | CVAIstart | 3         | 10.167 | 0.5508 | 9.9000  | 9.8000 | 9.8000    | 10.800    | 10.800    | 9.8000    | 10.800  |         |
|             |               | CVAIend   | 3         | 7.7000 | 2.0881 | 6.7000  | 6.3000 | 6.3000    | 10.100    | 10.100    | 6.3000    | 10.100  |         |

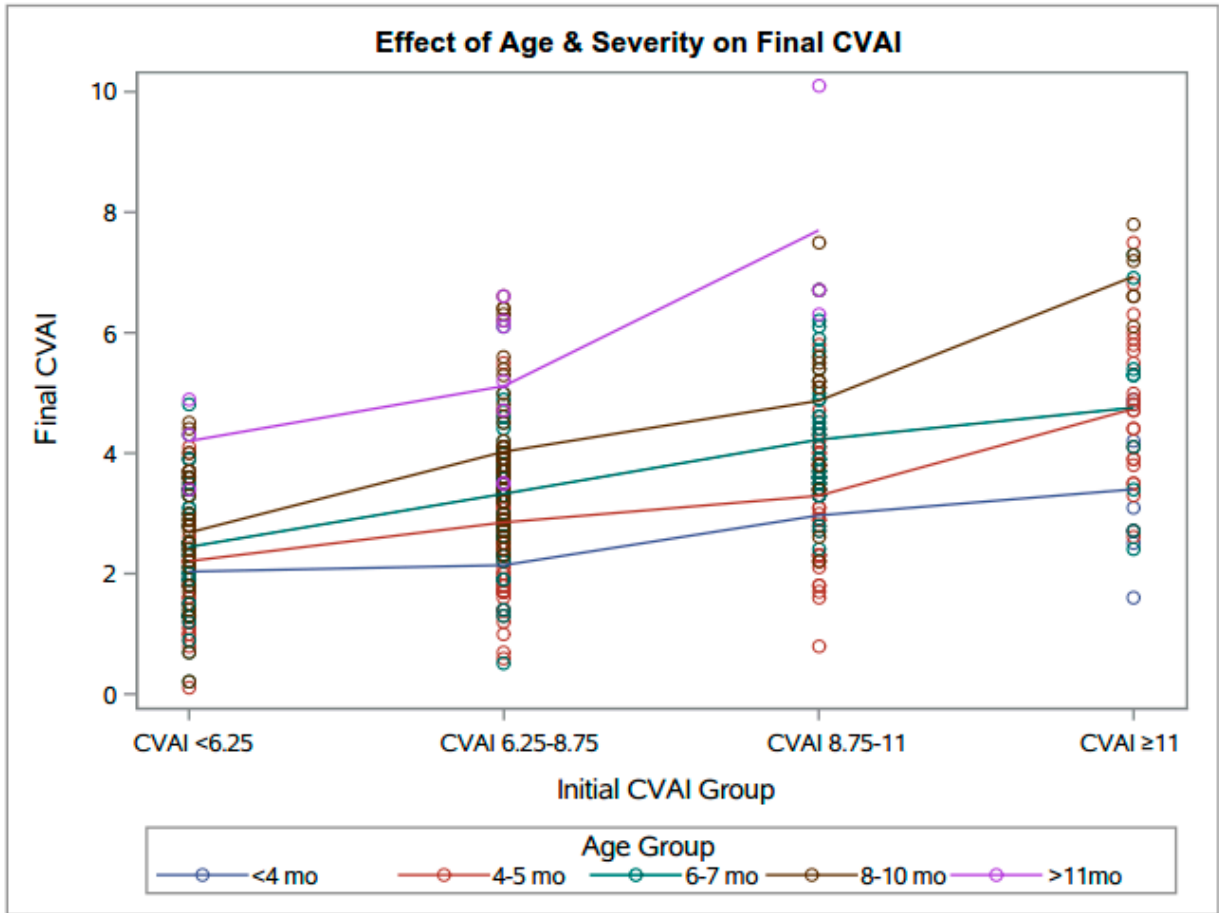

**Figure S1.** Raw Data Plot showing how increasing severity groups affect the final CVAI, subdivided by initial age groups.
